# Supplementary material for: Nano-engineering induced Bi dots in situ anchored into modified porous carbon with superior sodium ion storage
Source: Royal Society of Chemistry journal article supplement (doi:10.1039/d2ta06256a), 2022-01-01
Supplement: d2ta06256a1.pdf [file d2ta06256a1.pdf]

## Supporting Information

Nano-engineering induced Bi dots *in-situ* anchored into modified porous carbon with superior sodium ion storage

Jun Chen,<sup>a</sup> Jun Xiao,<sup>a,b</sup> Jiayi Li,<sup>a</sup> Hong Gao,<sup>\*a,b</sup> Xin Guo,<sup>b</sup> Hao Liu,<sup>\*a,b</sup> and Guoxiu Wang<sup>\*b</sup>

<sup>a</sup> International Laboratory on Environmental and Energy Frontier Materials, School of Environmental and Chemical Engineering, Shanghai University, Shanghai 200444, P. R. China.

E-mail: Candy1122@shu.edu.cn

<sup>b</sup> Centre for Clean Energy Technology, Faculty of Science, University of Technology Sydney, Broadway, Sydney, NSW 2007, Australia.

E-mail: hao.liu@uts.edu.au, Guoxiu.Wang@uts.edu.au

Detailed steps for in situ XRD testing:

The Bi@MC slurry was pasted onto an aluminum net, followed by drying at 120°C under vacuum for 12 h. The dried material was used as the electrode. Sodium foil and glass fiber was severed as the counter electrode and separator, respectively, and 1.0 M NaPF<sub>6</sub> in DME as electrolyte. The XRD chamber was equipped with a Be window to permit X-ray passage. *In situ* XRD patterns of the Bi@MC electrodes were tested on Bruker D8 Advanced (Cu Kα) and studied by a specially-made chamber (Beijing scistar technology co. ltd) in a scanning range of 10-90°(2θ) with step increment of 2.5°. The Be foil is the X-ray penetrator. The corresponding galvanostatic charge-discharge cycling was carried out at a current density of 100 mA g<sup>-1</sup> between 0.1 and 1.6 V versus Na<sup>+</sup>/Na.

The Bi content was calculated based on the following equation:

$$Bi(wt\%) = \frac{\text{final weight of } Bi_2O_3}{\text{initial weight of Bi@MC}} \times \frac{2 * \text{molecular weight of Bi}}{\text{molecular weight of } Bi_2O_3} \times 100\%$$

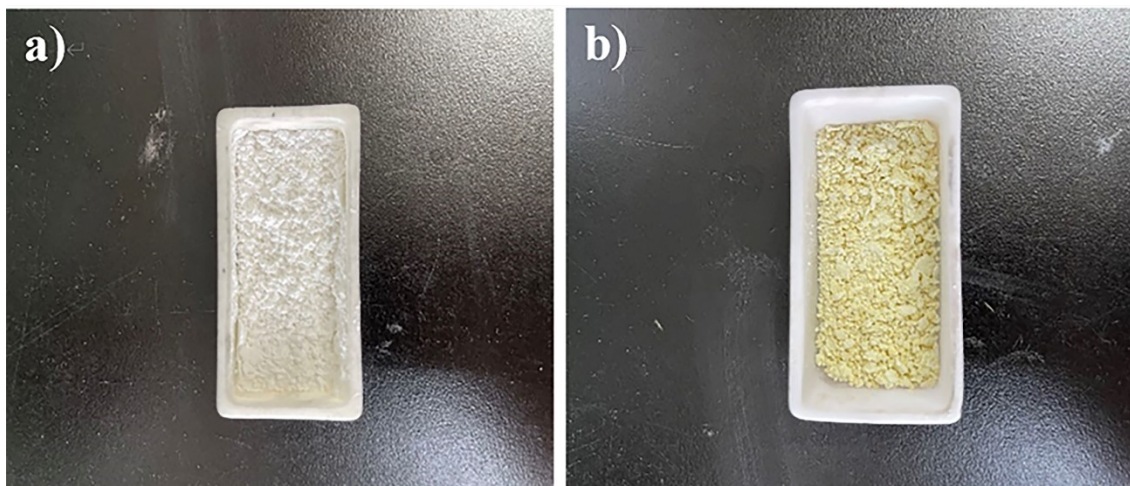

**Fig. S1** Digital photographs of a) bismuth subsalicylate (BS) and b) a mixture of BS and KOH.

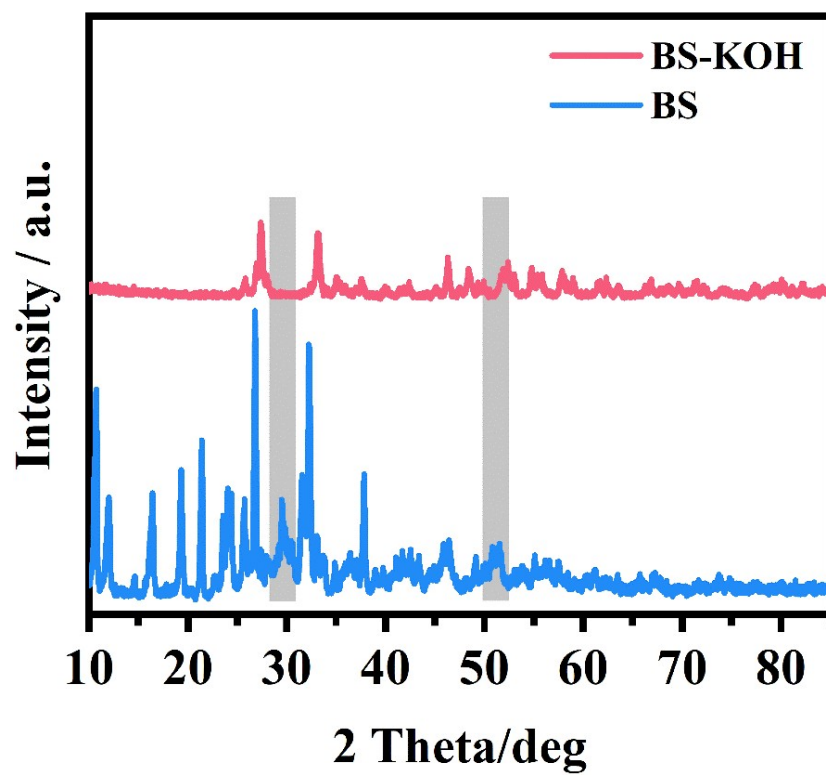

**Fig. S2** XRD patterns of BS and the mixture of BS and KOH.

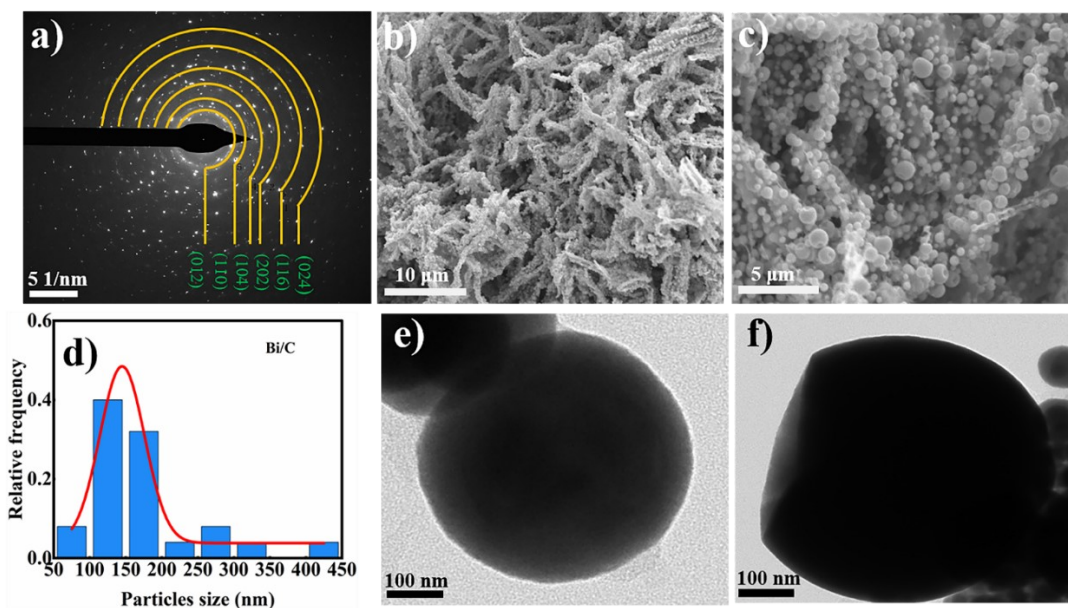

**Fig. S3** a) SAED image of Bi@MC, b-c) SEM images of Bi/C, d) the size distribution of Bi/C, e-f) TEM images of Bi/C.

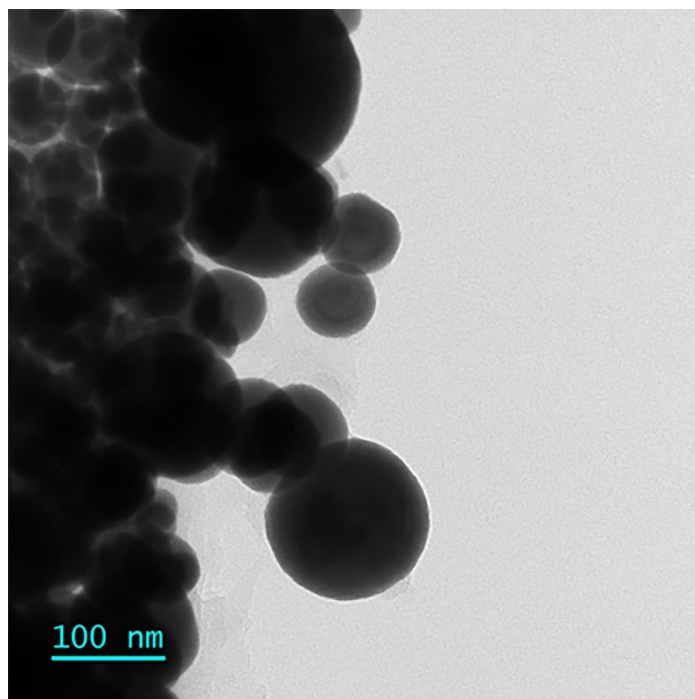

**Fig. S4** TEM image was used to calculate the particle size distribution of Bi/C.

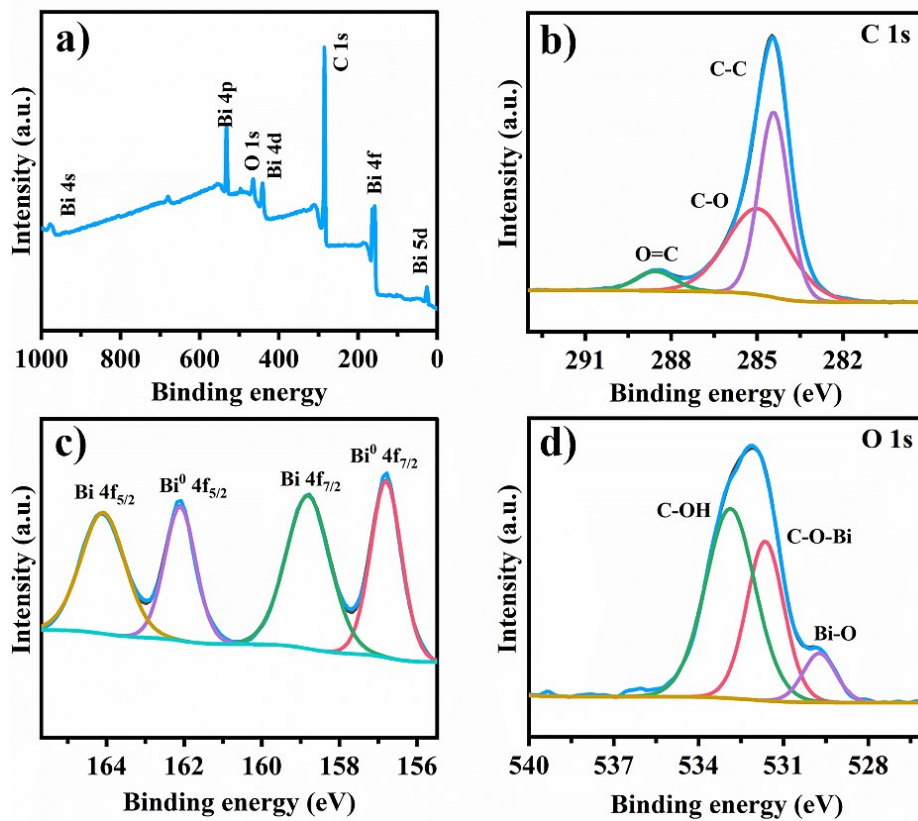

**Fig. S5** XPS spectra of (a) full survey, (b) high-resolution C 1s, (c) high-resolution Bi 4f, and (d) high-resolution O1s for Bi/C.

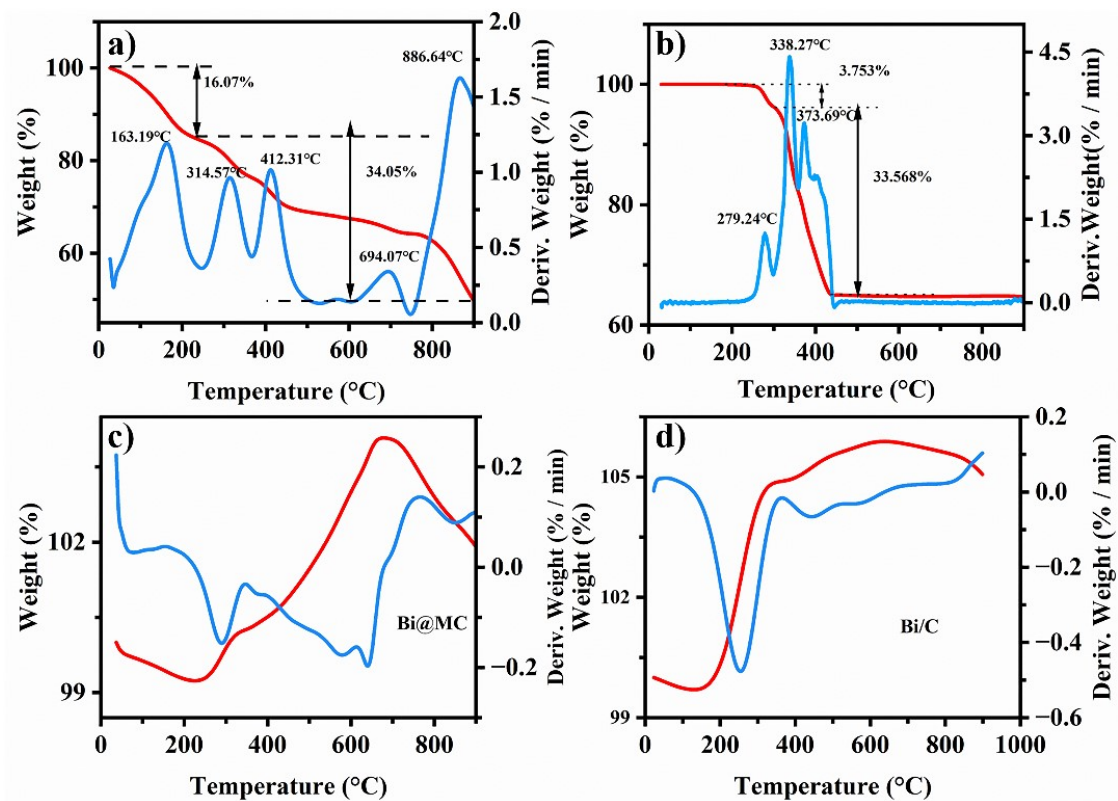

**Fig. S6** The TGA curves of a) mixture of BS and KOH, b) BS in Ar, c) Bi@MC and d) Bi/C in air.



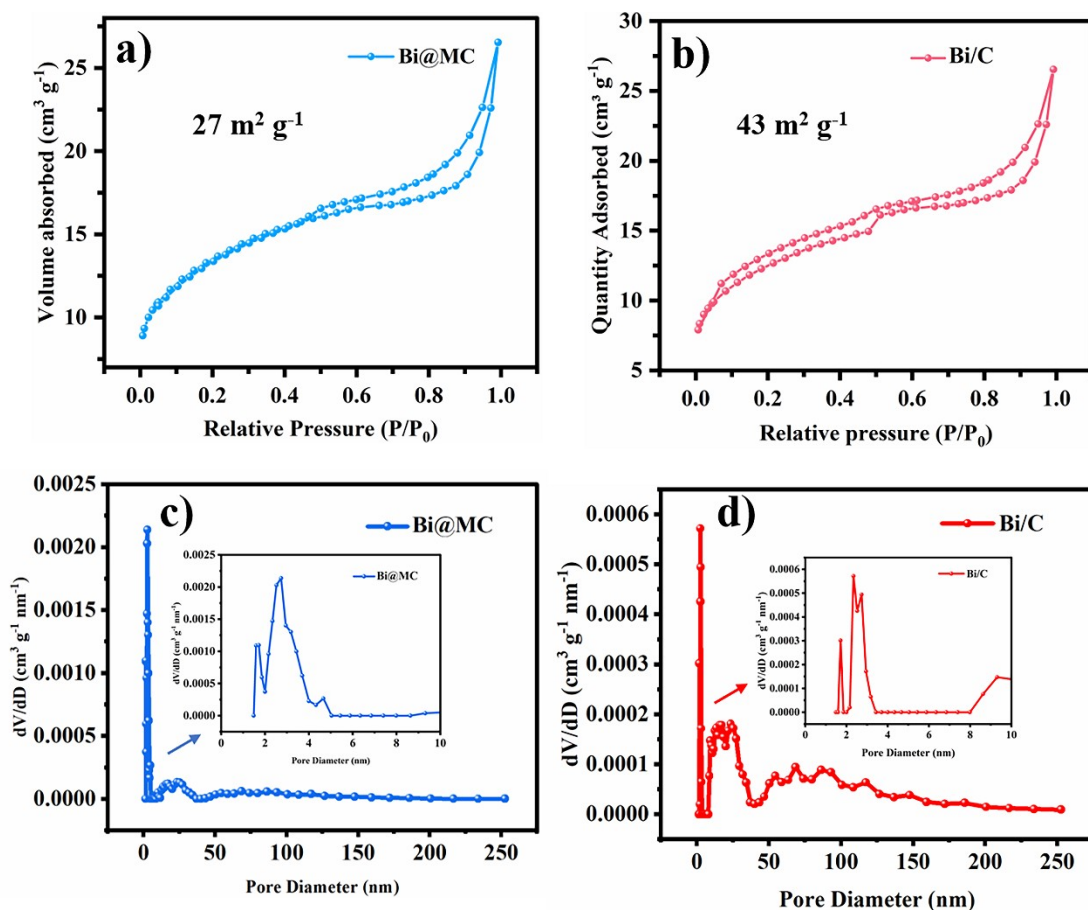

**Fig. S7**  $N_2$  adsorption-desorption isotherms spectra of a) Bi@MC and b) Bi/C. The pore size distribution of c) Bi@MC and d) Bi/C.

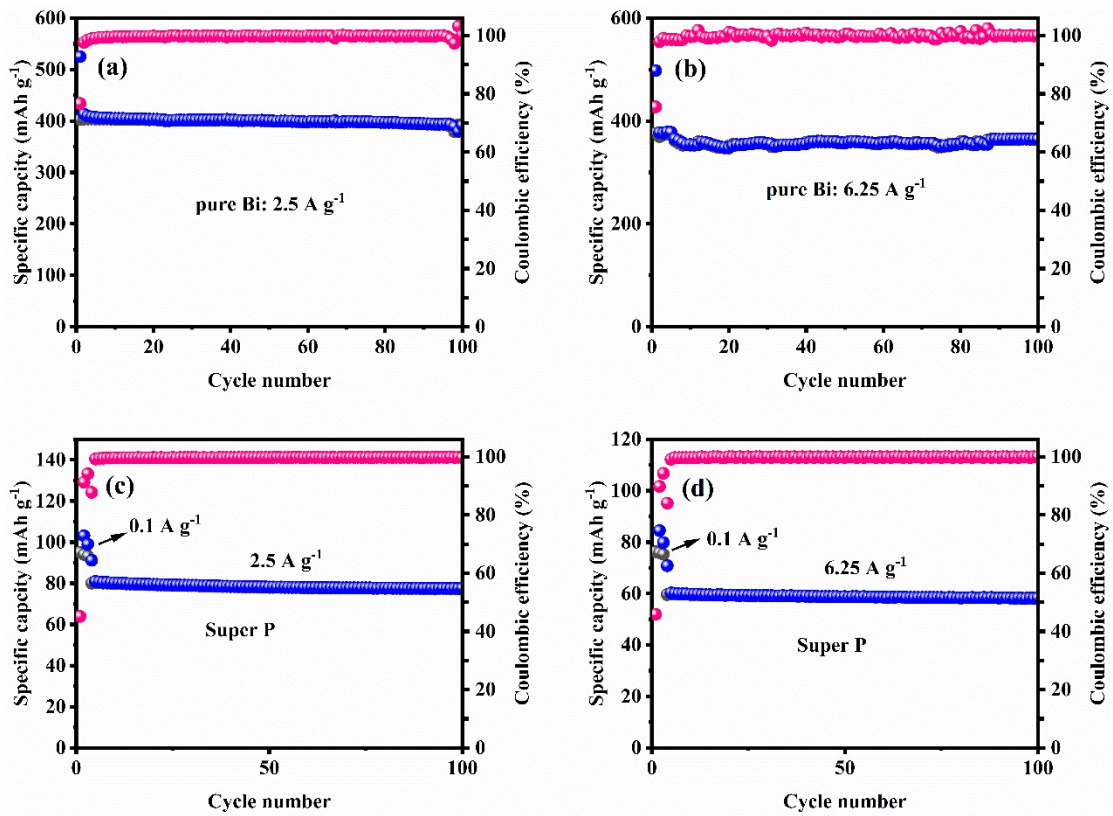

**Fig. S8** Cycle performance of pure Bi and super P at a, c) 2.5 A g<sup>-1</sup>, b, d) 6.25 A g<sup>-1</sup>.

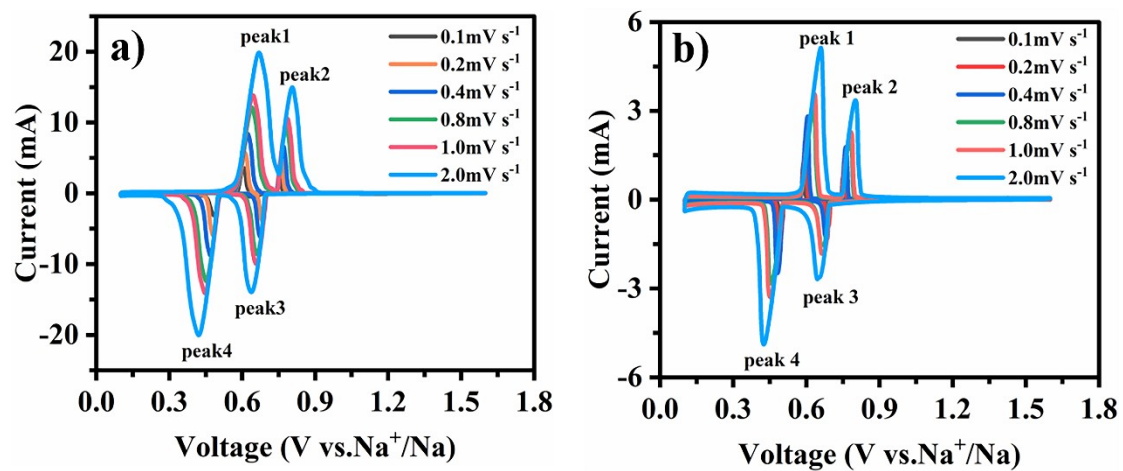

**Fig. S9** CV curves of a) Bi@MC and b) Bi/C at different scan rates (0.1, 0.2, 0.4, 0.8, 1, and 2 mV s<sup>-1</sup>, respectively).

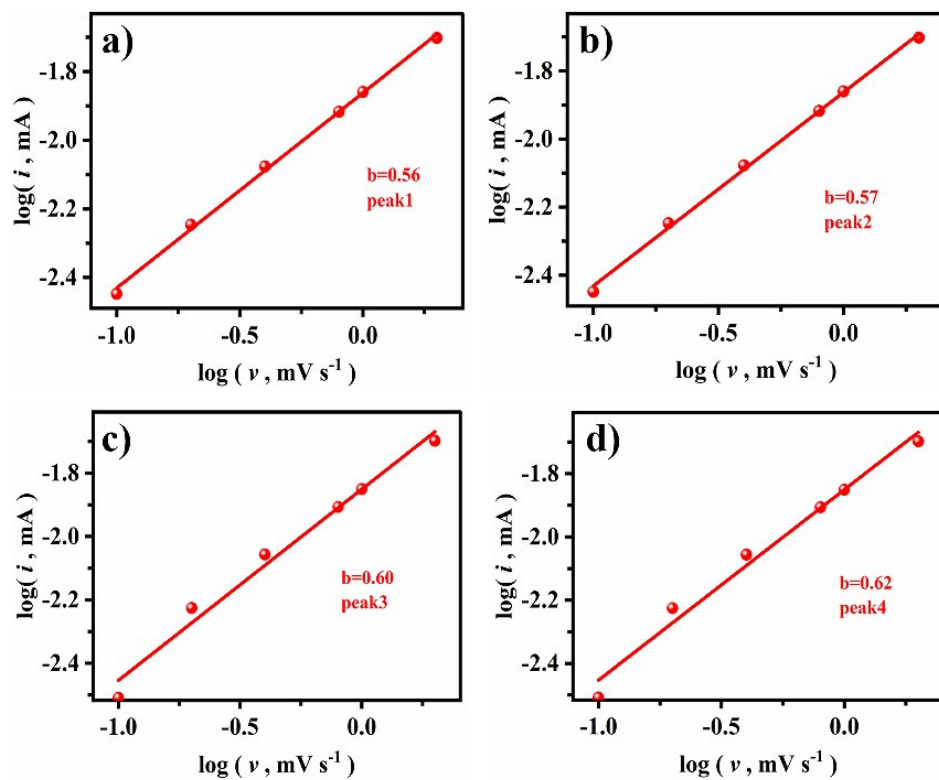

**Fig. S10** The fitted linear relationship of  $\log(v)$  versus  $\log(i)$  for Bi/C based on the CV curves at different rates shown in Fig S8 b): a) peak1, b) peak2, c) peak3, d) peak4.

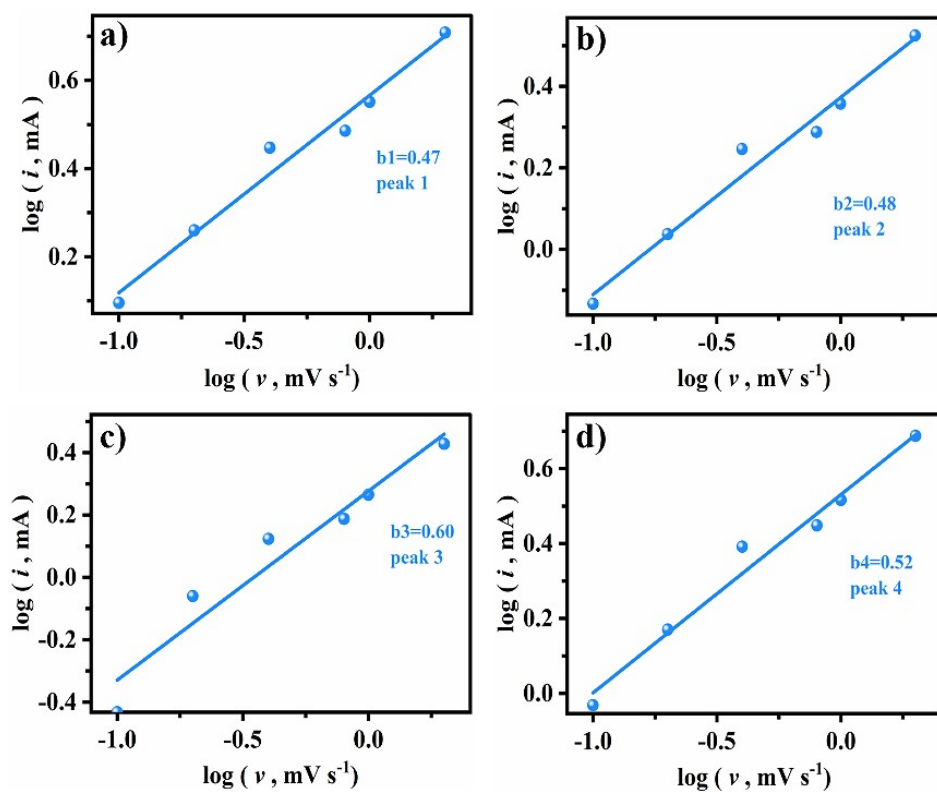

**Fig. S11** The fitted linear relationship of  $\log(v)$  versus  $\log(i)$  for Bi@MC based on the CV curves at different rates shown in Fig S8 a): a) peak1, b) peak2, c) peak3, d) peak4.

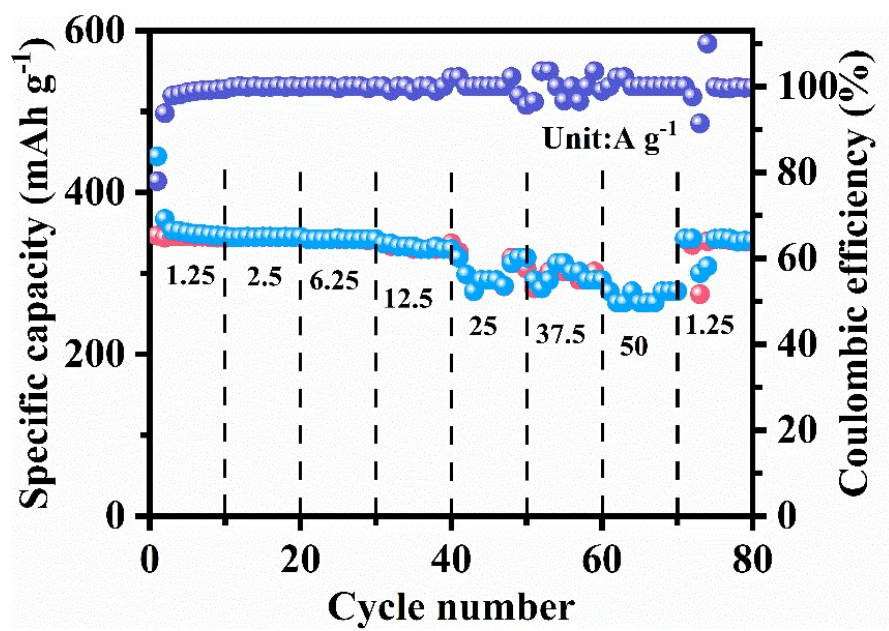

Fig. S12 Rate performance of the Bi/C electrode.

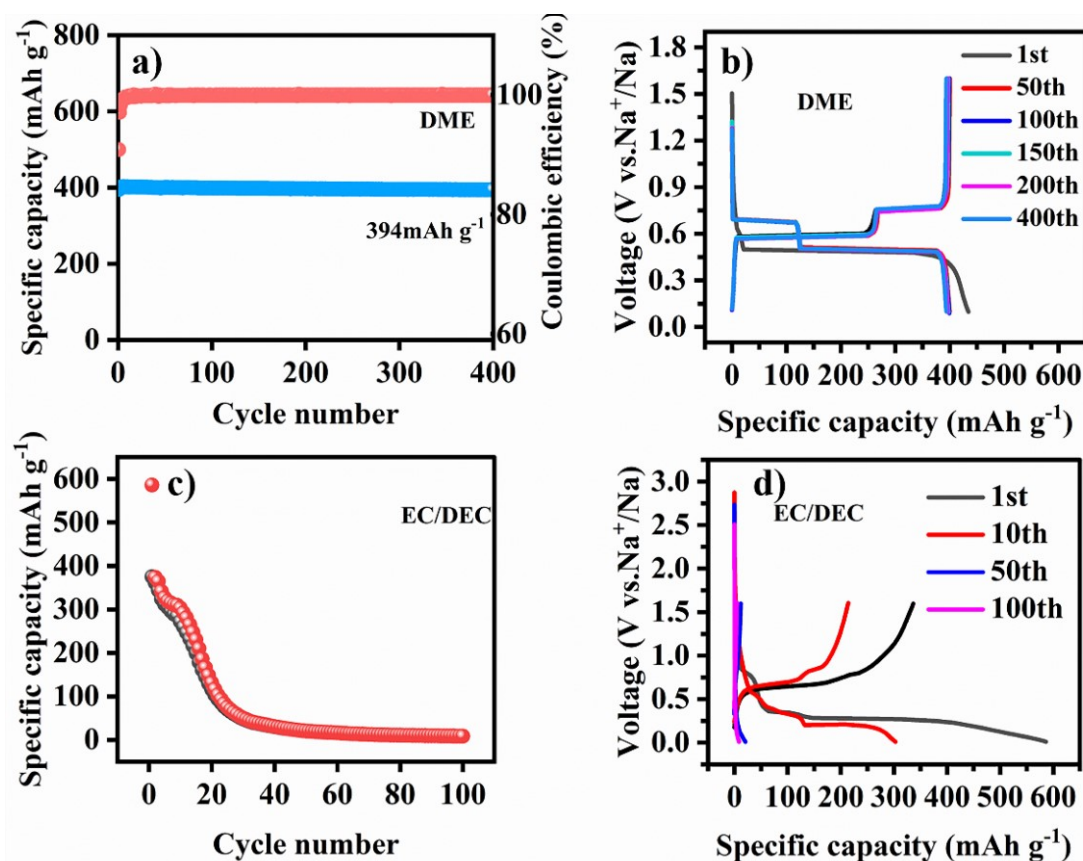

**Fig. S13** a) Electrochemical performance and b) selected charge/discharge curves of Bi@MC in DME-based electrolyte at a current density of 1.25 A g<sup>-1</sup>, c) electrochemical performance and d) selected charge/discharge curves of Bi@MC in EC/DEC-based electrolyte at a current density of 1.25 A g<sup>-1</sup>.

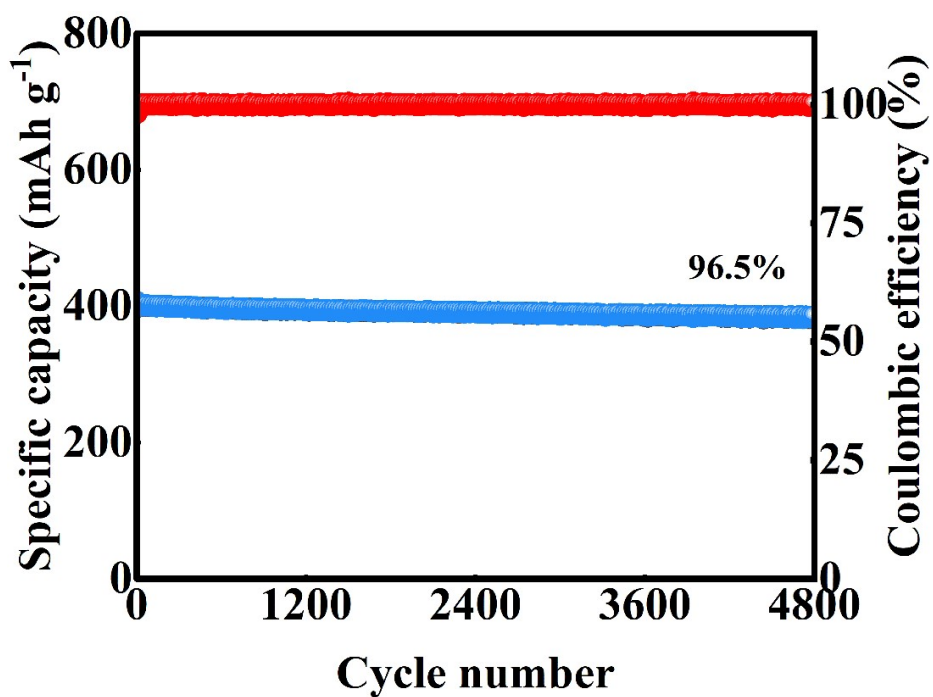

Fig. S14 Long cycle test of Bi@MC electrode at 5 A g<sup>-1</sup>.



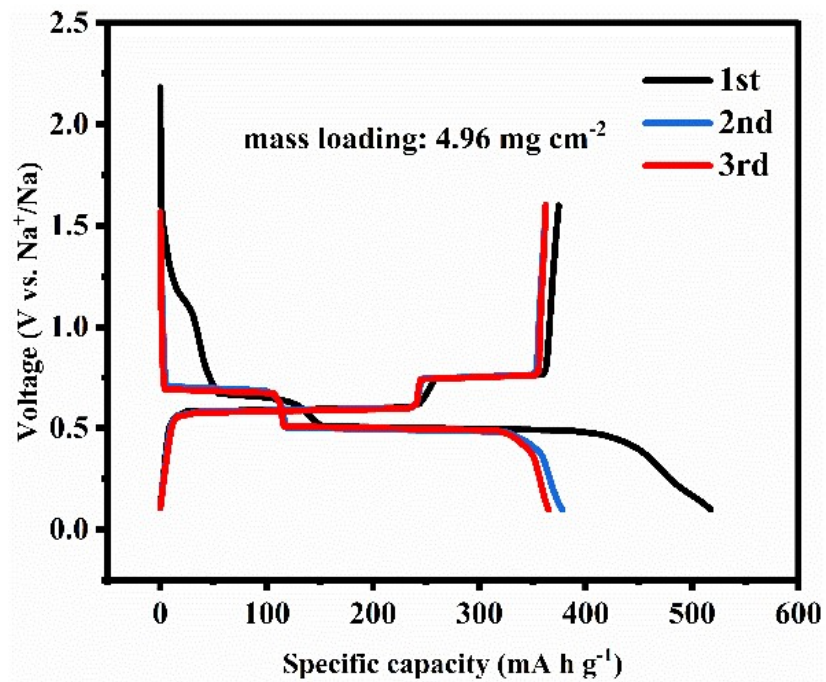

**Fig. S15** The electrochemical performance of Bi@MC with mass loading of 4.96 mg cm<sup>-2</sup>.

**Table S1.** Electrochemical comparison of this work with other reported Bi-based anodes for SIBs.

| <b>Electrode materials</b> | <b>Capacity @ cycle number at current density</b>                                                                      | <b>Rate performance (mAh g<sup>-1</sup>)</b>           | <b>Reference</b> |
|----------------------------|------------------------------------------------------------------------------------------------------------------------|--------------------------------------------------------|------------------|
| <b>Bi@MC</b>               | <b>378 mAh g<sup>-1</sup>@ 10000 at 2.5 A g<sup>-1</sup><br/>379 mAh g<sup>-1</sup>@ 5000 at 6.25 A g<sup>-1</sup></b> | <b>345 mAh g<sup>-1</sup>at 50000mA g<sup>-1</sup></b> | <b>This Work</b> |
| Bi@C=CFs                   | 305 @ 5000 at 5 A g <sup>-1</sup>                                                                                      | 308.8 at 80000 mA g <sup>-1</sup>                      | 1                |
| Bulk Bi                    | 360 @ 3500 at 7.7 A g <sup>-1</sup>                                                                                    | 325 at 57750 mA g <sup>-1</sup>                        | 2                |
| H-BiS/EGF                  | 261@17300 at 5 A g <sup>-1</sup>                                                                                       | 228 at 25000 mA g <sup>-1</sup>                        | 3                |
| HBiC                       | 264@15000 at 5 A g <sup>-1</sup>                                                                                       | 297 at 10000 mA g <sup>-1</sup>                        | 4                |
| Bi@graphene                | 200@50 at 40 mA g <sup>-1</sup>                                                                                        | 250 @1280 mA g <sup>-1</sup>                           | 5                |
| Bi@C                       | 300@100 at 150 mA g <sup>-1</sup>                                                                                      | —                                                      | 6                |
| Bi@C microsphere           | 123.5@100 at 100 mA g <sup>-1</sup>                                                                                    | 83.4 @2000 mA g <sup>-1</sup>                          | 7                |
| Bi nanorod bundle          | 301.9@150 at 50 mA g <sup>-1</sup>                                                                                     | 102.3@2000 mA g <sup>-1</sup>                          | 8                |
| Bulk Bi                    | 389@2000 at 400 mA g <sup>-1</sup>                                                                                     | 355@2000 mA g <sup>-1</sup>                            | 9                |
| Bi-NS@C                    | 106@1000 at 200 mA g <sup>-1</sup>                                                                                     | 110@2000 mA g <sup>-1</sup>                            | 10               |
| Bi/CFC                     | 350@300 at 50 mA g <sup>-1</sup>                                                                                       | 120@2000 mA g <sup>-1</sup>                            | 11               |
| Bi/C nanofibers            | 273.2@500 at 100 mA g <sup>-1</sup>                                                                                    | 69@3200 mA g <sup>-1</sup>                             | 12               |
| Bi nanoflakes              | 302.4@100 at 200 mA g <sup>-1</sup>                                                                                    | 206.4@2000 mA g <sup>-1</sup>                          | 13               |
| Bi@graphite                | ~140@10000 at 3.2A g <sup>-1</sup>                                                                                     | 113@48000 mA g <sup>-1</sup>                           | 14               |
| Bi@C nanoplates            | 200@200 at 150 mA g <sup>-1</sup>                                                                                      | 74@2000 mA g <sup>-1</sup>                             | 15               |
| Bi@N-C                     | 235@2000 at 10 A g <sup>-1</sup>                                                                                       | 178@100000 mA g <sup>-1</sup>                          | 16               |
| Bi@3DGF                    | 185.2@2000 at 10 A g <sup>-1</sup>                                                                                     | 194@50000 mA g <sup>-1</sup>                           | 17               |
| Bi@N-C                     | 302@1000 at 1 A g <sup>-1</sup>                                                                                        | 368@2000 mA g <sup>-1</sup>                            | 18               |

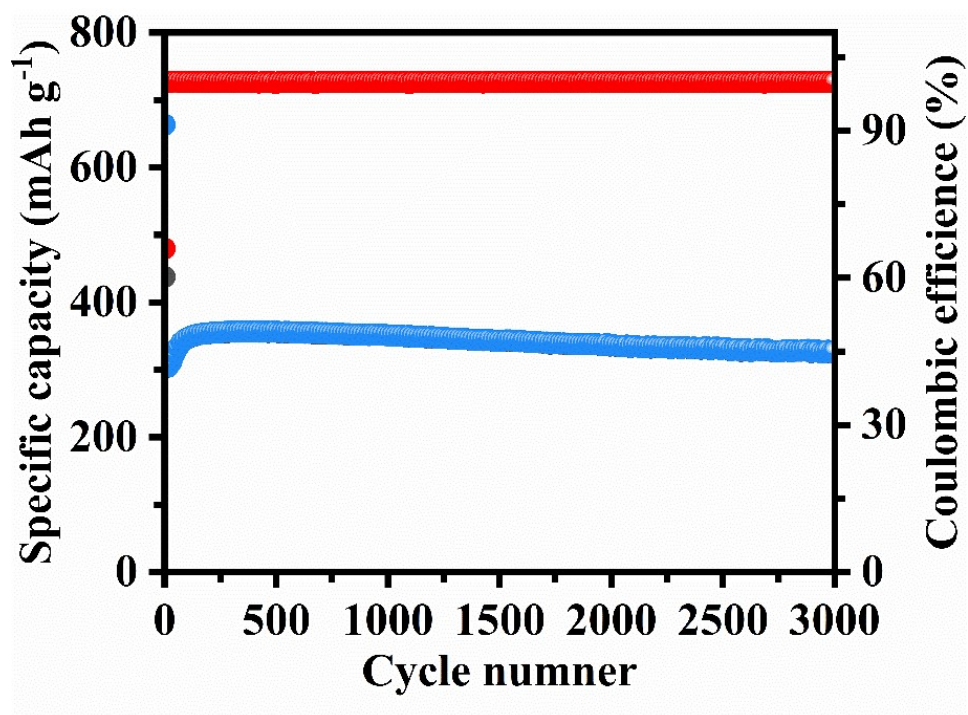

**Fig. S16** Cycling performance of Bi/C electrode at a current density of 1.25 A g<sup>-1</sup> after 3000 cycles.

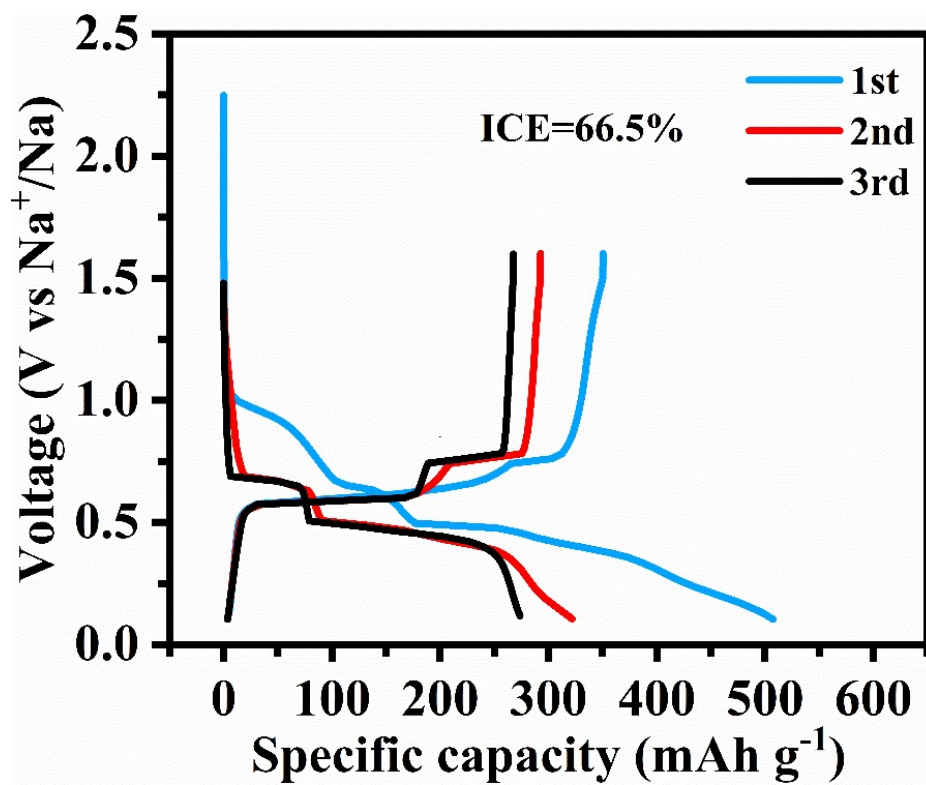

Fig. S17 First three charge/discharge curves of Bi/C electrode.

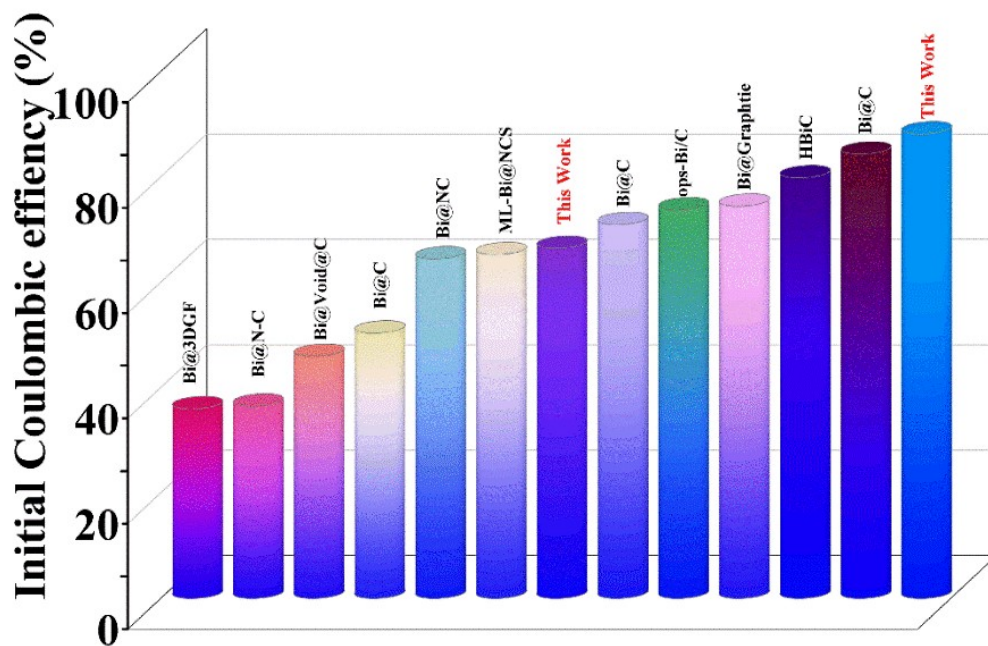

**Fig.S18** Initial Coulombic efficiency comparison of this work with other reported Bi-based anodes for SIBs.

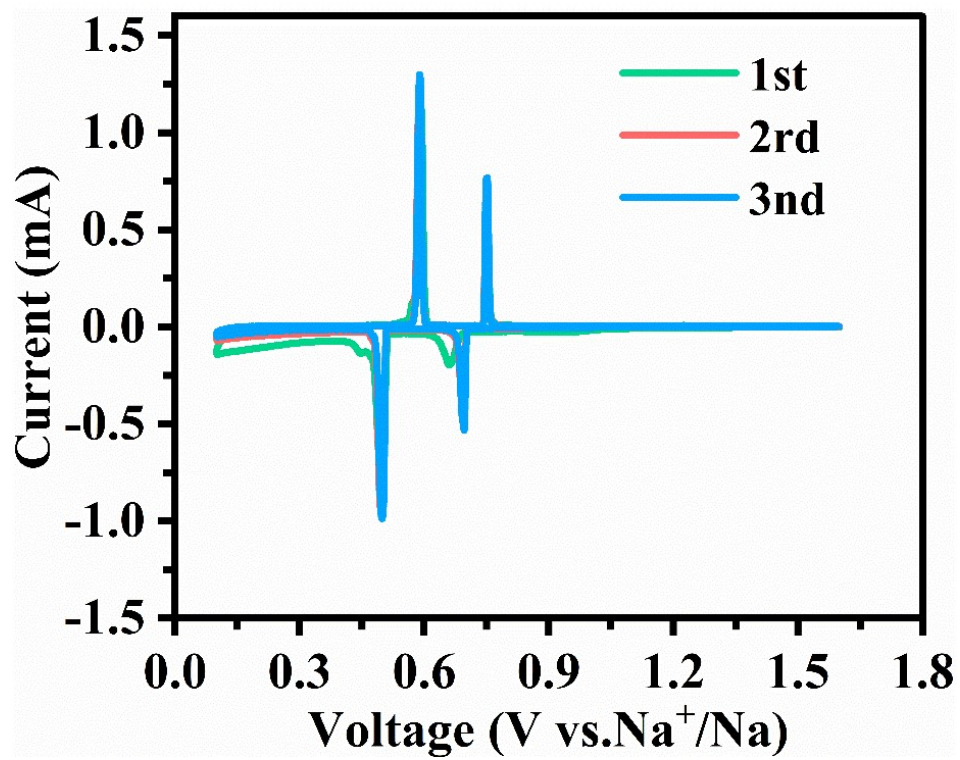

Fig.S19 First three CV curves of Bi/C electrode.

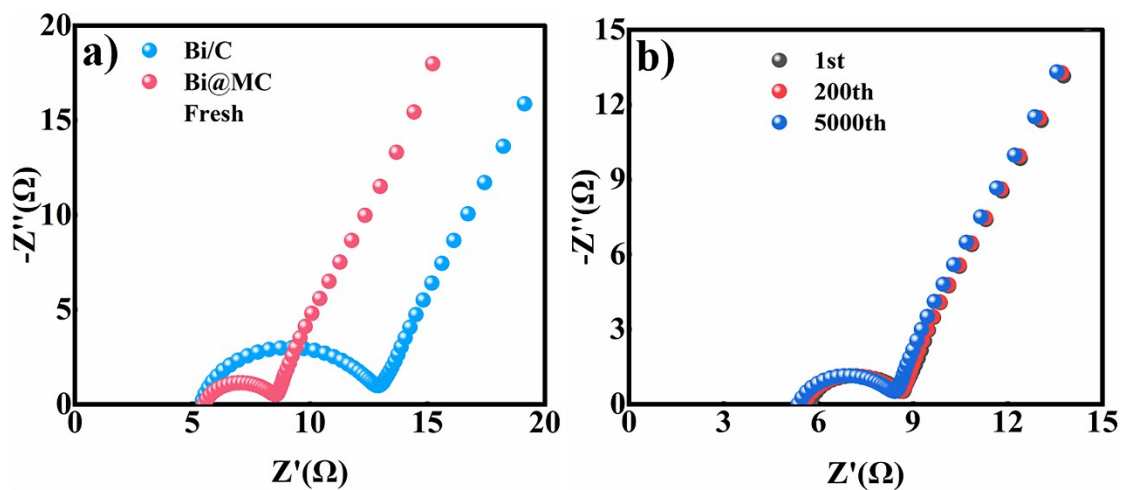

**Fig. S20** a) Nyquist plots of fresh Bi@MC and Bi/C composite electrodes, b) Nyquist plots of Bi@MC electrode at 1<sup>st</sup>, 200<sup>th</sup> and 5000<sup>th</sup> cycle, respectively.



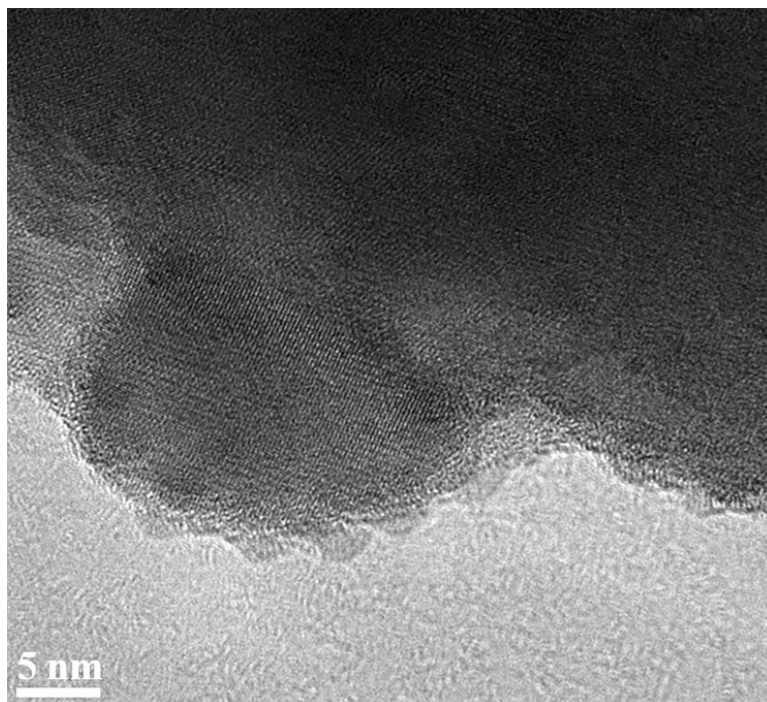

**Fig. S21** the overview image of Fig. 4f.



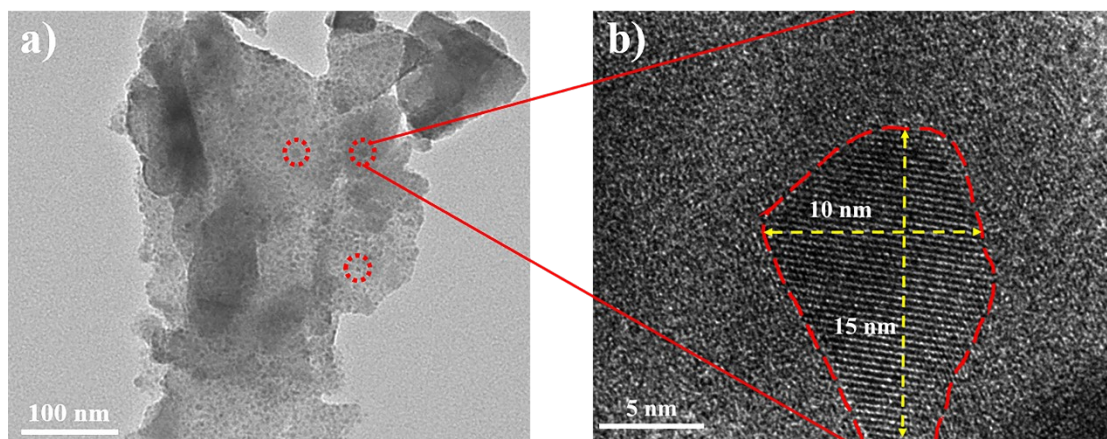

**Fig. S22** HRTEM image of the Bi@MC electrode after 200 cycles.

**Table S2.** The distribution of two types oxygen-functional groups on Bi@MC and Bi/C composites.

| Samples | O/C   | C-OH (%) |
|---------|-------|----------|
| Bi@MC   | 0.187 | 18.02    |
| Bi/C    | 0.135 | 13.1     |

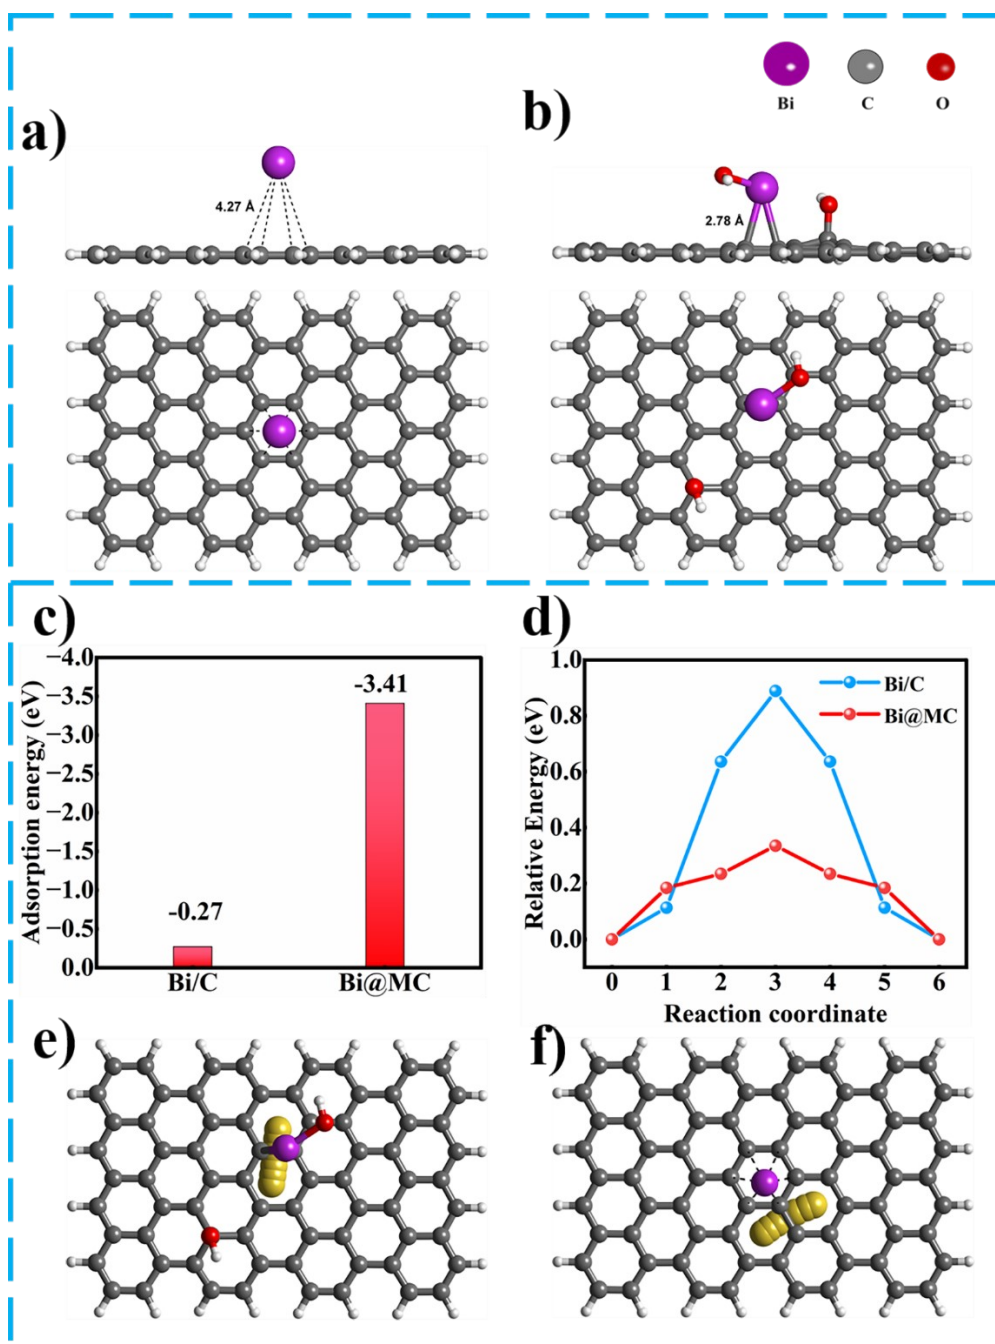

**Fig. S23** Optimized structures of Bi adsorption on (a) graphene and (b) KOH-modified graphene. c) The calculated adsorption energy of Bi and d) Na diffusion energy barrier on graphene and KOH-modified graphene, respectively. Schematic representation of Na<sup>+</sup> diffusion path on (e) Bi-graphene and (f) Bi-graphene-KOH.

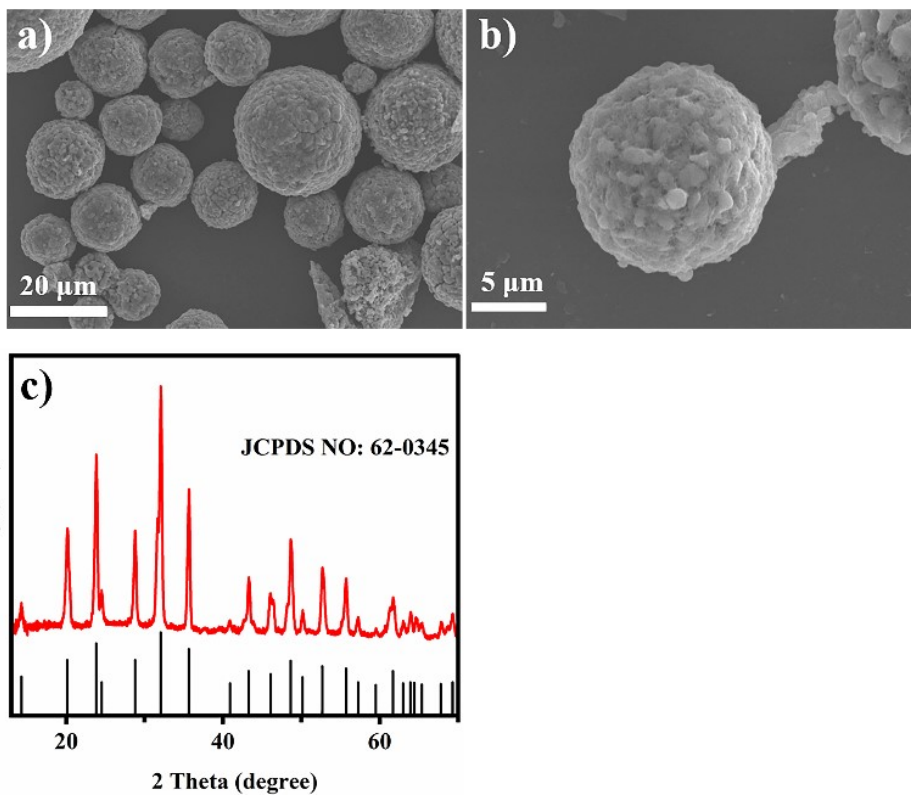

**Fig. S24** The a, b) SEM image and c) XRD pattern of NVP.

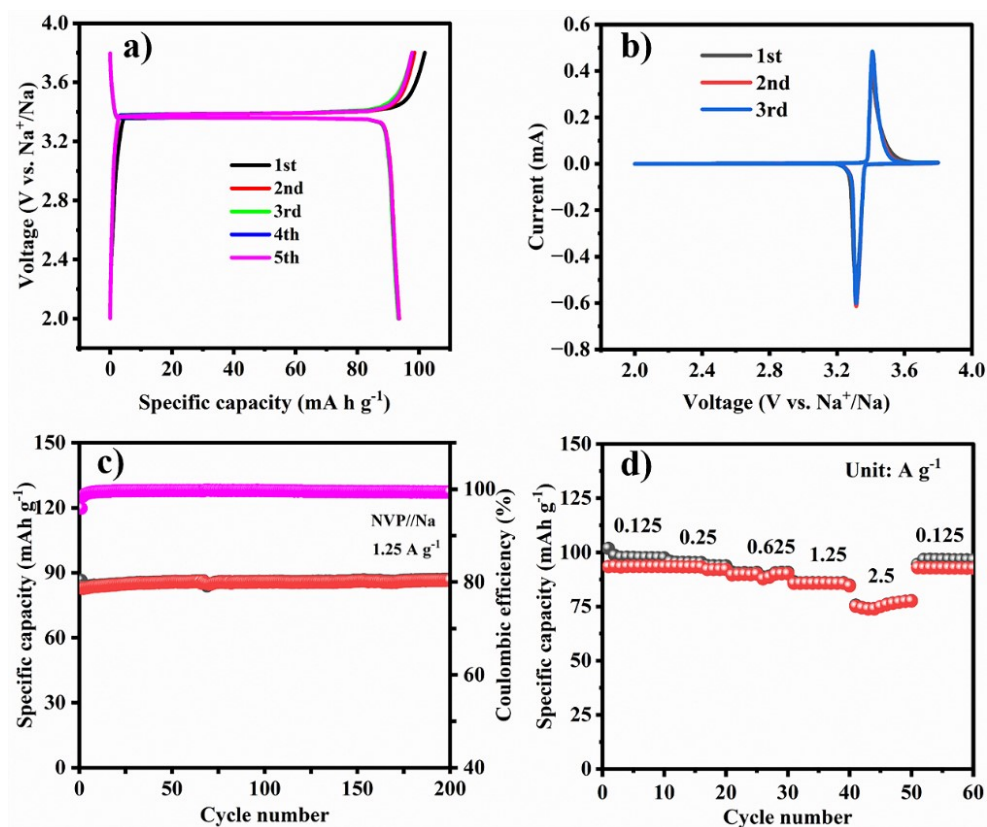

**Fig. S25** a) Discharge/charge curve of NVP//Na at  $1.25 \text{ A g}^{-1}$ , b) first three CV ( $0.1 \text{ mV s}^{-1}$ ) curves of NVP//Na. c) electrochemical cycling performance of NVP//Na at  $1.25 \text{ A g}^{-1}$ , b) rate performance of NVP//Na at different current densities.

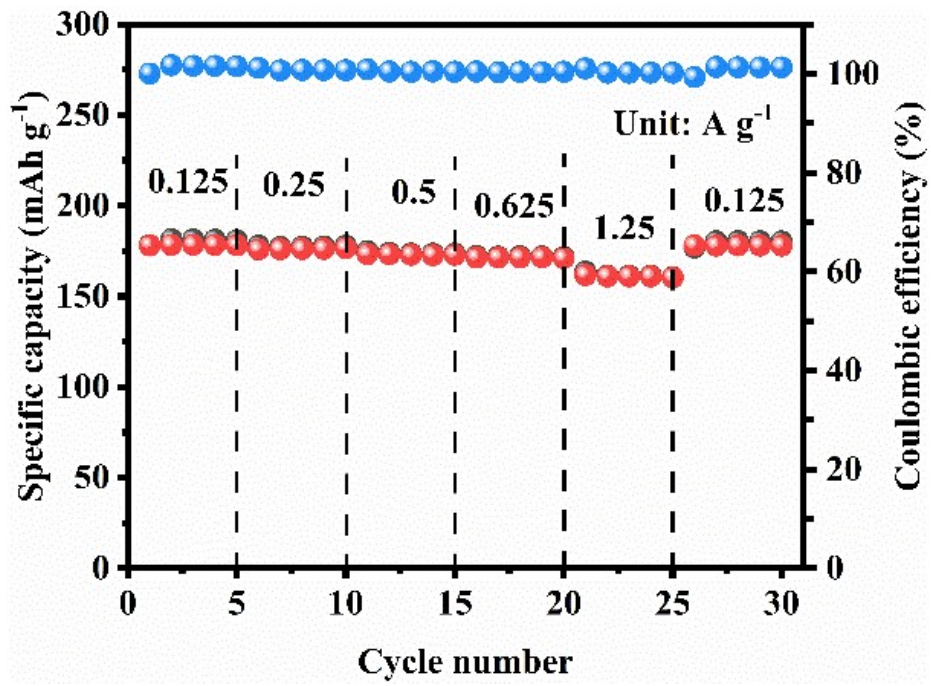

Fig. S26 The rate performance of full cell (NVP | Bi@MC).

## Reference

1. Y. Liang, N. Song, Z. Zhang, W. Chen, J. Feng, B. Xi and S. Xiong, *Adv. Mater.*, 2022, **34**, 2202673.
2. Y. H. Kim, J. H. An, S. Y. Kim, X. Li, E. J. Song, J. H. Park, K. Y. Chung, Y. S. Choi, D. O. Scanlon, H. J. Ahn and J. C. Lee, *Adv. Mater.*, 2022, **34**, 2201446.
3. S. Cai, F. Yan, Y. X. Zhao, M. Q. Li, Y. W. Chen, X. R. He and C. Wang, *Chem. Eng. J.*, 2022, **430**, 132938.
4. X. Qiu, X. Wang, Y. He, J. Liang, K. Liang, B. L. Tardy, J. J. Richardson, M. Hu, H. Wu, Y. Zhang, O. J. Rojas, I. Manners and J. Guo, *Sci. Adv.*, 2021, **7**, eabh3482.
5. D. W. Su, S. X. Dou and G. X. Wang, *Nano Energy*, 2015, **12**, 88-95.
6. Y. B. Zhao and A. Manthiram, *Chem. Mater.*, 2015, **27**, 3096-3101.
7. F. H. Yang, F. Yu, Z. A. Zhang, K. Zhang, Y. Q. Lai and J. Li, *Chem. Eur. J.*, 2016, **22**, 2333-2338.
8. S. Liu, J. K. Feng, X. F. Bian, J. Liu and H. Xu, *J. Mater. Chem. A*, 2016, **4**, 10098-10104.
9. C. C. Wang, L. B. Wang, F. J. Li, F. Y. Cheng and J. Chen, *Adv. Mater.*, 2017, **29**, 1702212.
10. J. X. Qiu, S. Li, X. T. Su, Y. Z. Wang, L. Xu, S. Q. Yuan, H. M. Li and S. Q. Zhang, *Chem. Eng. J.*, 2017, **320**, 300-307.

11. S. N. Liu, Z. G. Luo, J. H. Guo, A. Q. Pan, Z. Y. Cai and S. Q. Liang, *Electrochem. Commun.*, 2017, **81**, 10-13.
12. H. Yin, Q. W. Li, M. L. Cao, W. Zhang, H. Zhao, C. Li, K. F. Huo and M. Q. Zhu, *Nano Res.*, 2017, **10**, 2156-2167.
13. L. B. Wang, C. C. Wang, F. J. Li, F. Y. Cheng and J. Chen, *Chem. Commun.*, 2018, **54**, 38-41.
14. J. Chen, X. Fan, X. Ji, T. Gao, S. Hou, X. Zhou, L. Wang, F. Wang, C. Yang, L. Chen and C. Wang, *Energy Environ. Sci.*, 2018, **11**, 1218-1225.
15. J. Xiang, Z. M. Liu and T. Song, *Chemistryselect*, 2018, **3**, 8973-8979.
16. H. Yang, R. Xu, Y. Yao, S. F. Ye, X. F. Zhou and Y. Yu, *Adv. Funct. Mater.*, 2019, **29**, 1809195.
17. X. Cheng, D. Li, Y. Wu, R. Xu and Y. Yu, *J. Mater. Chem. A*, 2019, **7**, 4913-4921.
18. P. Xue, N. Wang, Z. Fang, Z. Lu, X. Xu, L. Wang, Y. Du, X. Ren, Z. Bai, S. Dou and G. Yu, *Nano Lett.*, 2019, **19**, 1998-2004.
